# Supplementary material for: Immunity to Sda1 Protects against Infection by Sda1+ and Sda1− Serotypes of Group A Streptococcus
Source: MDPI journal article supplement (doi:10.3390/vaccines10010102), 2022-01-11
Supplement: s1 [file s1]

**A**

|          |                                                             |     |
|----------|-------------------------------------------------------------|-----|
| DNase_B  | MNLLGSRVFSKKCRLVKFSMVALVSATMAVTTVTLENTALARQTQVSNDVVLNDGASKY | 60  |
| GP_01207 | MNLLGSRVFSKKCRLVKFSMVALVSATMAVTTVTLENTALARQTQVSNDVVLNDGASKY | 60  |
| *****    |                                                             |     |
| DNase_B  | LNEALAWTFNDSPNYKTLGTSQITPALFPKAGDILYSKLDLGRTTARGTLTYANVEG   | 120 |
| GP_01207 | LNEALAWTFNDSPNYKTLGTSQITPALFPKAGDILYSKLDLGRTTARGTLTYANVEG   | 120 |
| *****    |                                                             |     |
| DNase_B  | SYGVRQSFQKQNPAGWTGNPNHVKYIEWNLGLSYVGFWNRSHLIADSLGGDALRVNA   | 180 |
| GP_01207 | SYGVRQSFQKQNPAGWTGNPNHVKYIEWNLGLSYVGFWNRSHLIADSLGGDALRVNA   | 180 |
| *****    |                                                             |     |
| DNase_B  | VTGTRTQNVGGRDQKGGMRYTEQRAQEWLEANRDGYLYEAAPIYNADELIPRAVVSMQ  | 240 |
| GP_01207 | VTGTRTQNVGGRDQKGGMRYTEQRAQEWLEANRDGYLYEVAPIYNADELIPRAVVSMQ  | 240 |
| *****    |                                                             |     |
| DNase_B  | SSDNTINEKVLVYNTANGYTINYHNGTPTQK                             | 271 |
| GP_01207 | SSDNTINEKVLVYNTANGYTINYHNGTPTQK                             | 271 |
| *****    |                                                             |     |

**B**

|          |                                                               |     |
|----------|---------------------------------------------------------------|-----|
| SpdB     | MKLSKQKASLLTAVLLLLSLSITTTITVDAARVRTYPNVSHANTHYKNTVSSKLLPFTANY | 60  |
| GP_01309 | MKLSKQKASLLTAVLLLLSLSITTTITVDAAKVRTYPNVSHANTHYKNTASSKLLPFTANY | 60  |
| *****    |                                                               |     |
| SpdB     | QLQLGELDNLRATFSHIQLQDRHETKDVRTKINYDPVGVHNYQFPYGDGSKSSWVMNRG   | 120 |
| GP_01309 | QLQLGELDNLRATFSHIQLQDRHETKDVRTKINYDPVGVHNYQFPYGDGSKSSWVMNRG   | 120 |
| *****    |                                                               |     |
| SpdB     | HLVGYQFCGLNDEPRNLVAMTAWLNTGAYSGANDSNPEGMLYYENRLDSWLALHPDFWLD  | 180 |
| GP_01309 | HLVGYQFCGLNDEPRNLVTMTAWLNTGAYSGANDSNPEGMLYYENRLDSWLALHPDFWLD  | 180 |
| *****    |                                                               |     |
| SpdB     | YKVTPIYSGNEVVPRIELQYVGIDSSGELLTIRLNSNKESIDENGVTTVILENSAPNIN   | 240 |
| GP_01309 | YKVTPIYSGNEVVPRIELQYVGIDSSGELLTIRLNSNKESIDENGVTTVILENSAPNIN   | 240 |
| *****    |                                                               |     |
| SpdB     | LDYLNGTATPKN                                                  | 252 |
| GP_01309 | LDYLNGTATPKN                                                  | 252 |
| *****    |                                                               |     |

**Figure S3. Alignments of DNase B (SpeF) and SpdB with amino acid sequences in proteome encoded by M3.11 genomic DNA.** Alignment of amino acid sequence of DNase B (NCBI Reference Sequence: WP\_010922721.1) with GP\_01207 (amino acid sequence from GAS M3.11 proteome) A); and SpdB (NCBI Reference Sequence: WP\_002985324.1) with GP\_01309 (amino acid sequence from GAS M3.11 proteome) (B) by Clustal Omega (<https://www.ebi.ac.uk/Tools/msa/clustalo/>). Amino acid color

code obtained from Clustal Omega is as follows: red, small; blue, acidic; magenta, basic; green, hydroxyl or sulfhydryl or amine.
